# Supplementary material
Source: PubMed Central journal article supplement (PMC5705002)
Supplement: NIHMS889254-supplement-Supp_FigS4.pdf [file NIHMS889254-supplement-Supp_FigS4.pdf]

# Color Key

## and Histogram

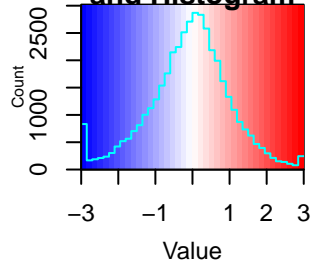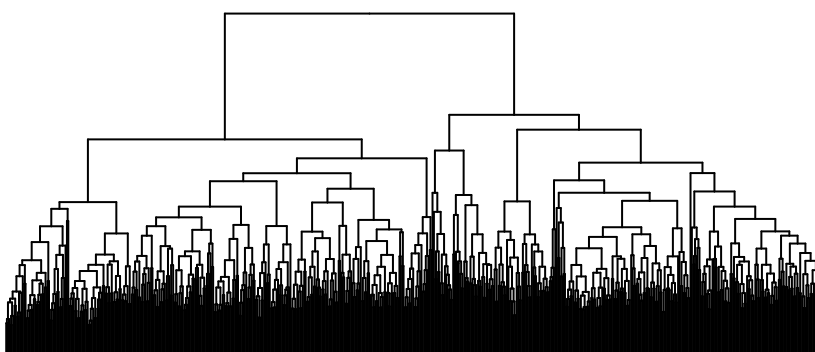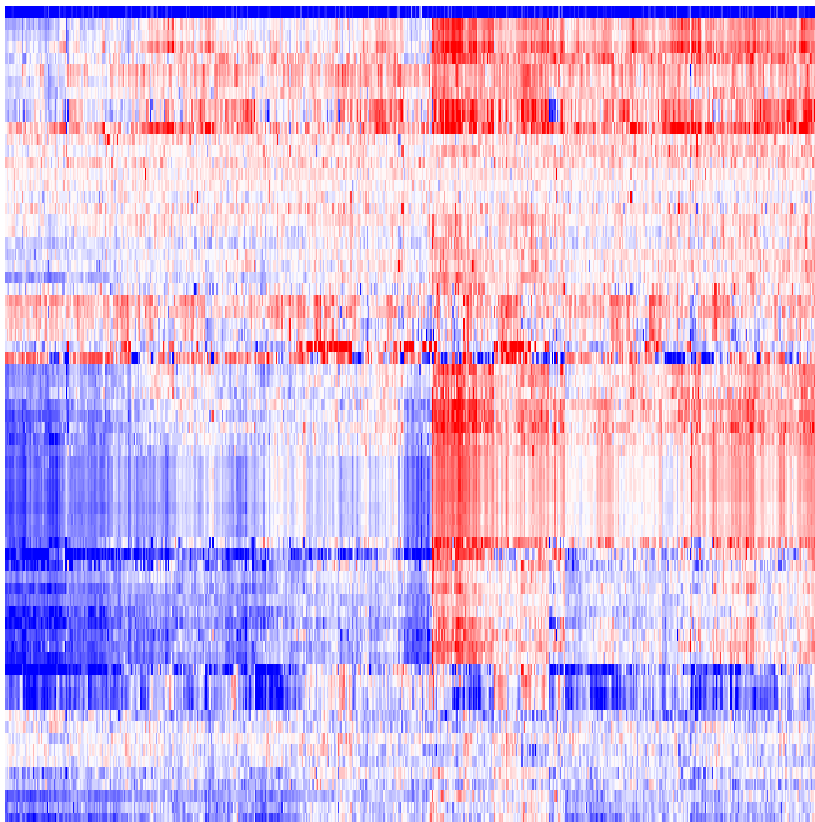

7A2  
2A2  
2A3  
2A4  
2A5  
2A6  
2A7  
2A8  
2A9  
2A10  
2A11  
2A12  
2A13  
2A14  
2A15  
2A16  
2A17  
2A18  
2A19  
2A20  
2A21  
2A22  
2A23  
2A24  
2A25  
2A26  
2A27  
2A28  
2A29  
2A30  
2A31  
2A32  
2A33  
2A34  
2A35  
2A36  
2A37  
2A38  
2A39  
2A40  
2A41  
2A42  
2A43  
2A44  
2A45  
2A46  
2A47  
2A48  
2A49  
2A50  
2A51  
2A52  
2A53  
2A54  
2A55  
2A56  
2A57  
2A58  
2A59  
2A60  
2A61  
2A62  
2A63  
2A64  
2A65  
2A66  
2A67  
2A68  
2A69  
2A70  
2A71  
2A72  
2A73  
2A74  
2A75  
2A76  
2A77  
2A78  
2A79  
2A80  
2A81  
2A82  
2A83  
2A84  
2A85  
2A86  
2A87  
2A88  
2A89  
2A90  
2A91  
2A92  
2A93  
2A94  
2A95  
2A96  
2A97  
2A98  
2A99  
2A100
