# Supplementary material
Source: PubMed Central journal article supplement (PMC5705002)

TCGA-BRCA  
SURVIVAL MEASURE - OVERALL SURVIVAL  
AD, HIST1H2BF, HIST1H4E, HIST1H2BG, HIST1H2AE, HIST1H3E, HIST1H1D, HIST1H4F, HIST1H4G, HIST1H3F, HIST1H2BH, HIST1H3G, HIST1H3D, HIST1H2BF, HIST1H4E, HIST1H2BG, HIST1H2AE, HIST1H3E, HIST1H1D, HIST1H4F, HIST1H4G, HIST1H3F, HIST1H2BH, HIST1H3G, HIST1H3D  
COHORT DIVIDED AT MEDIAN OF GENE EXPRESSION

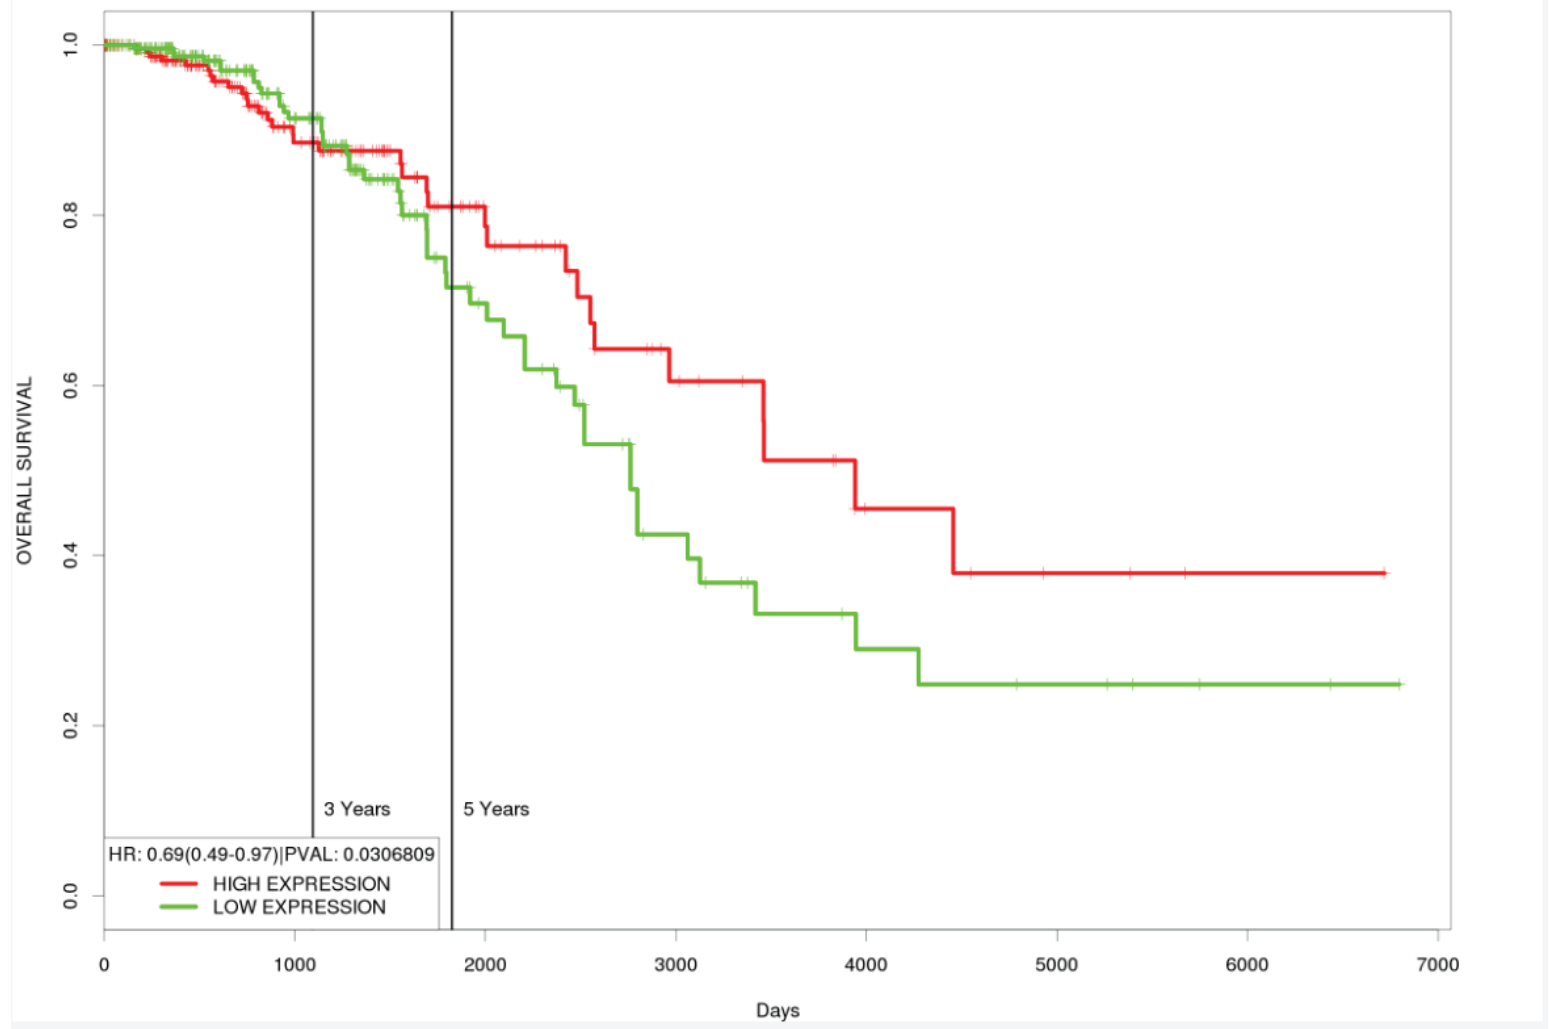

Supplement: NIHMS889254-supplement-Supp_FigS7.pdf [file NIHMS889254-supplement-Supp_FigS7.pdf]
