# Supplementary material
Source: PubMed Central journal article supplement (PMC5705002)
Supplement: NIHMS889254-supplement-Supp_FigS9.pdf [file NIHMS889254-supplement-Supp_FigS9.pdf]

## MCF10 STR analysis

| STR Locus  |          |           |
|------------|----------|-----------|
|            | MCF10AT1 | MCF10CA1a |
| Amelogenin | X,,      | X,,       |
| CSF1PO     | 10,12,   | 10,12,    |
| D13S317    | 8,9,     | 8,9,      |
| D16S539    | 11,12,   | 11,12,    |
| D21S11     | 28,30,   | 28,30,    |
| D5S818     | 10,13,   | 10,13,    |
| D7S820     | 10,11,   | 10,11,    |
| THO1       | 8,9.3,   | 8,9.3,    |
| TPOX       | 9,11,    | 9,11,     |
| vWA        | 14,15,17 | 14,15,17  |

\*MCF10A STR was performed in Hong et al. 2017.

# MCF10A Karyotype

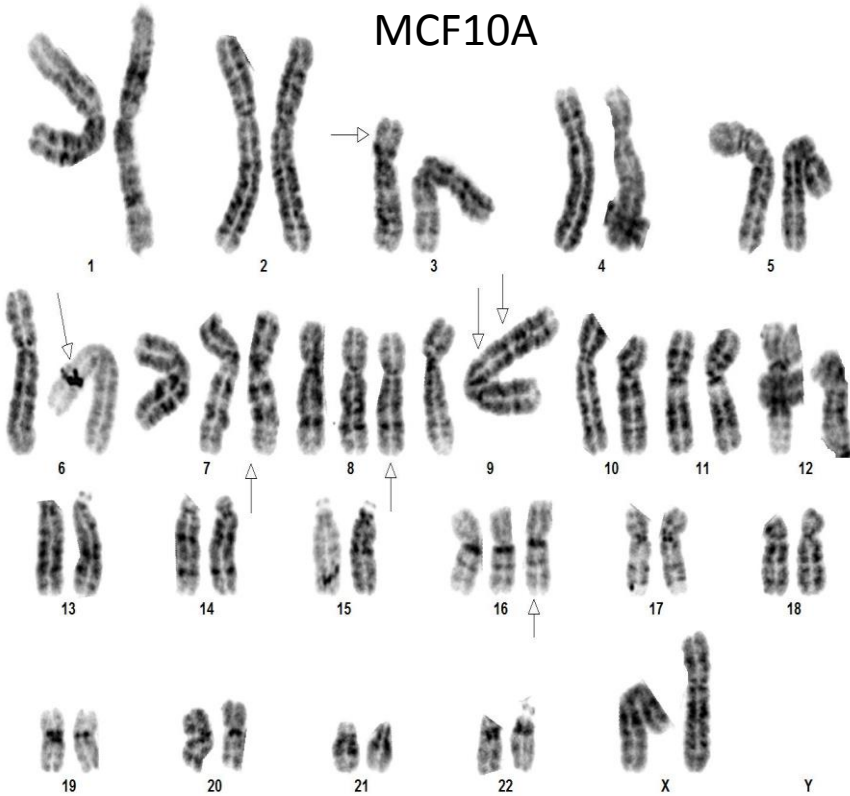

## MCF10A

| % cells | translocations             | aneuploidies             |
|---------|----------------------------|--------------------------|
| 40      | t(3;9) t(6;19)<br>t(5;3;9) | chr8 chr16               |
| 25      | t(3;9) t(6;19)<br>t(5;3;9) | chr7 chr8 chr16          |
| 25      | t(3;9) t(6;19)<br>t(5;3;9) | chr8 chr16<br>chr18      |
| 10      | t(3;9) t(6;19)<br>t(5;3;9) | chr7 chr8 chr16<br>chr18 |

# MCF10AT1 Karyotype

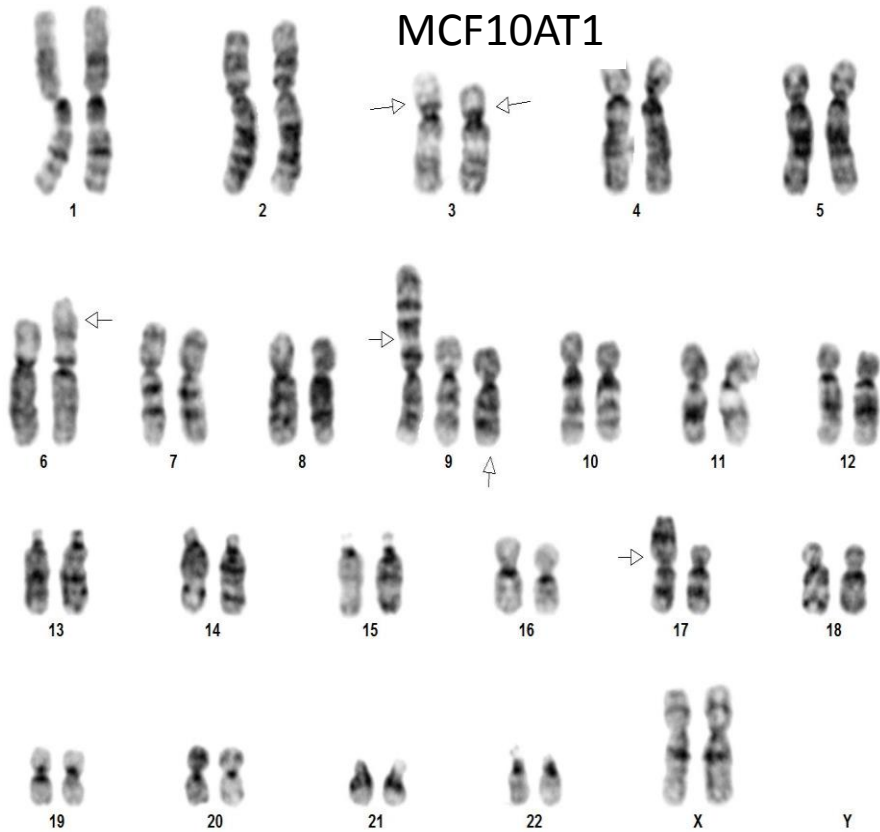

## MCF10AT1

| % cells | translocations            | aneuploidies       |
|---------|---------------------------|--------------------|
| 70      | t(3;9) t(6;19)<br>t(3;17) | t(5;3;9)           |
| 20      | t(3;9) t(6;19)<br>t(3;17) | t(5;3;9)<br>chr20  |
| 10      | t(3;9) t(6;19)<br>t(3;17) | t(5;3;9)<br>marker |

# MCF10CA1a Karyotype

MCF10CA1a

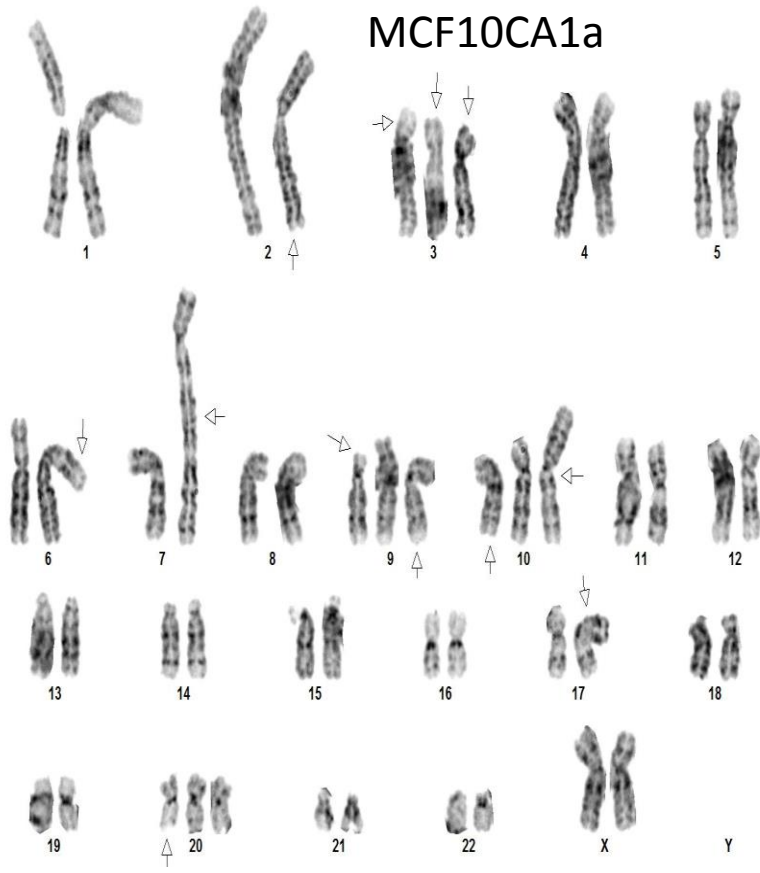

MCF10CA1a

| %  | translocations             | Aneuploidies                             |
|----|----------------------------|------------------------------------------|
| 55 | t(3;9) t(6;19)<br>t(5;3;7) | t(3;17) t(5;9) chr20<br>t(2p;10q)        |
| 20 | t(3;9) t(6;19)<br>t(5;3;7) | t(3;17) t(5;9) chr20<br>t(2p;10q) m      |
| 10 | t(3;9) t(6;19)<br>t(5;3;7) | t(3;17) t(5;9) chr20<br>t(2p;10q) chr18  |
| 5  | t(3;9) t(6;19)<br>t(5;3;7) | t(3;17) t(5;9) chr20<br>t(2p;10q) m + 18 |
