# Supplementary material
Source: PubMed Central journal article supplement (PMC5705002)

## RNA-seq

## Q-PCR

### Zeb1

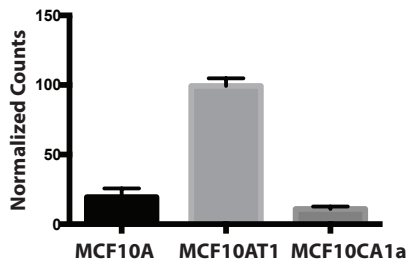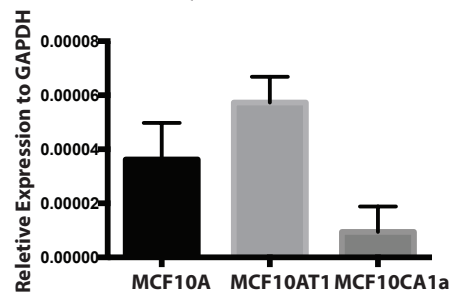

### Zeb2

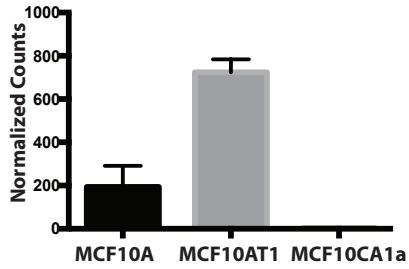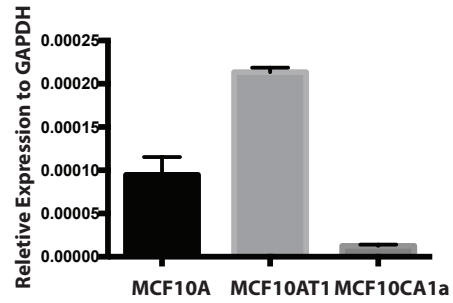

### CDH1

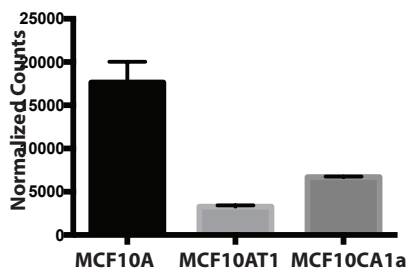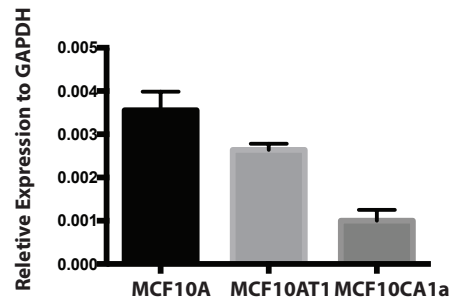

### Vimentin

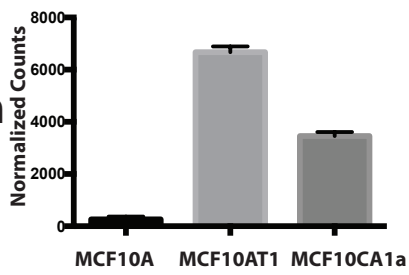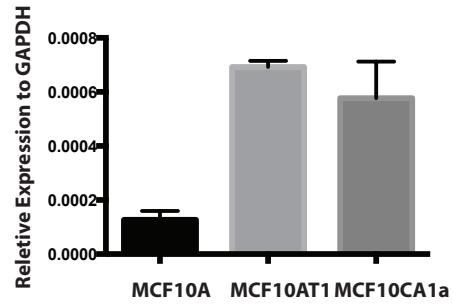

### CDH2

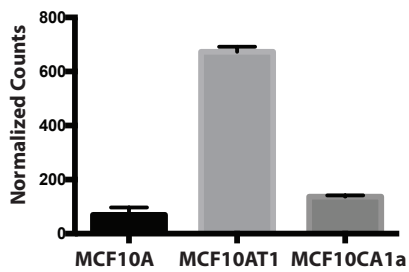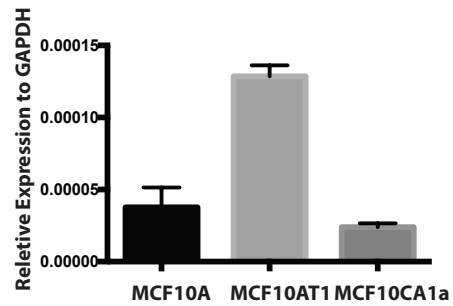

### Snail1

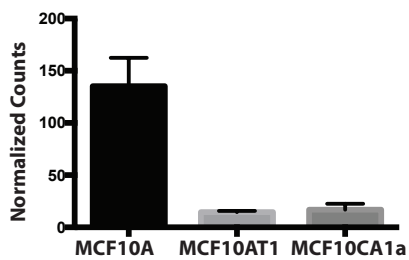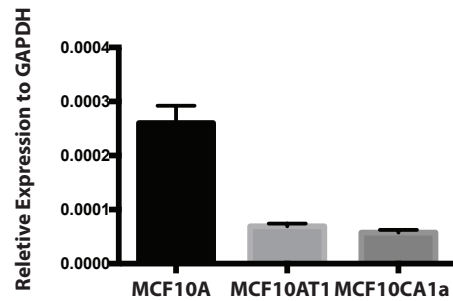

### Twist1

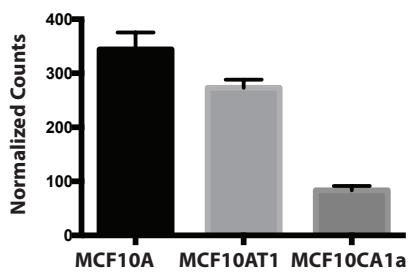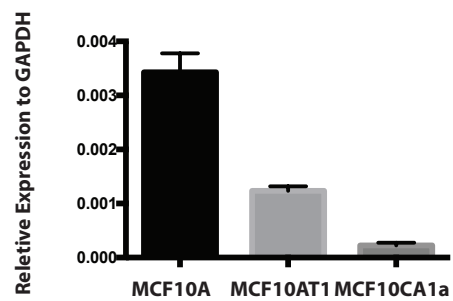

Supplement: NIHMS889254-supplement-Supp_FigS1.pdf [file NIHMS889254-supplement-Supp_FigS1.pdf]

A

UBF

DIC

UBF

DIC

CSK

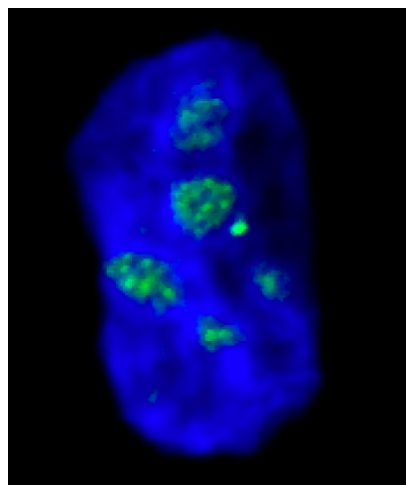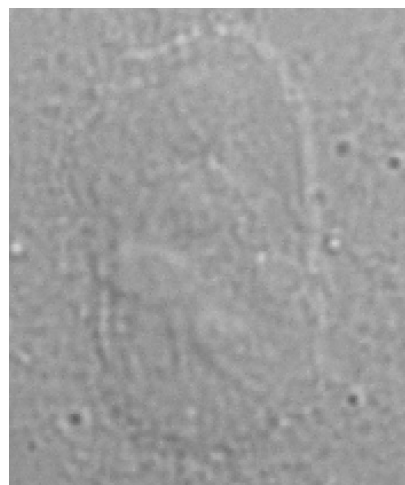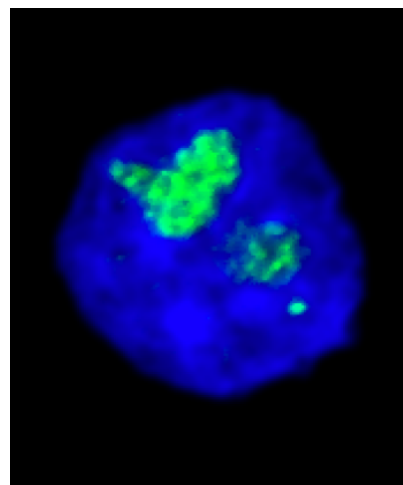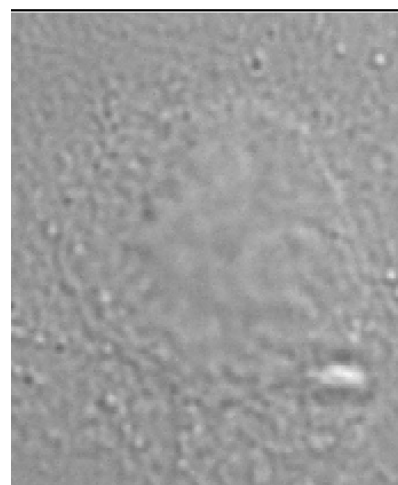

NM

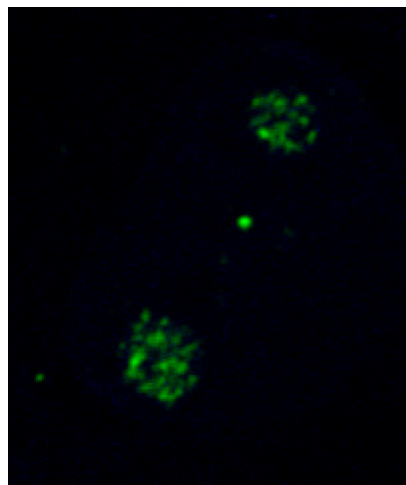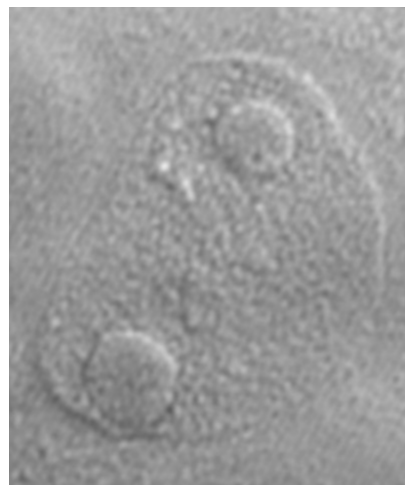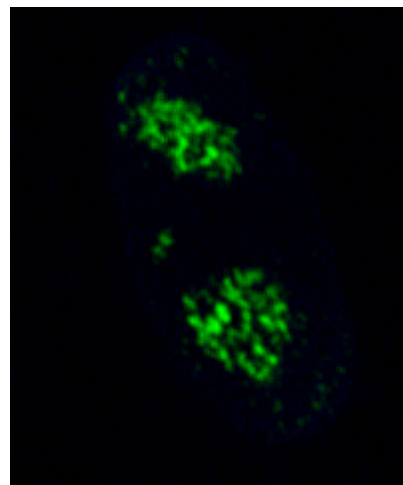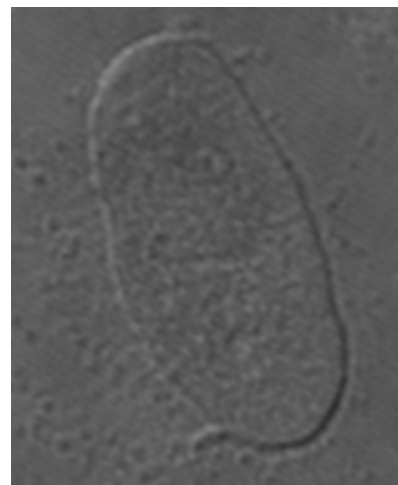

B

DAPI

CTCF

NPAT

MERGE

CSK

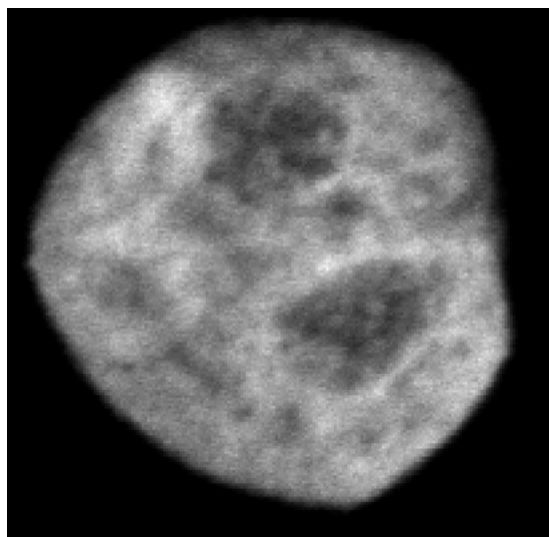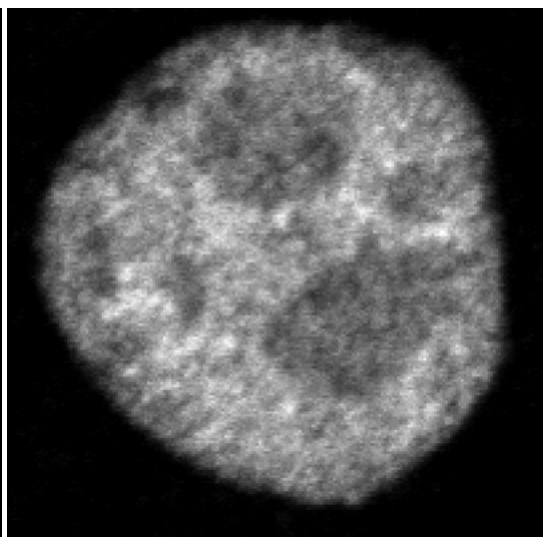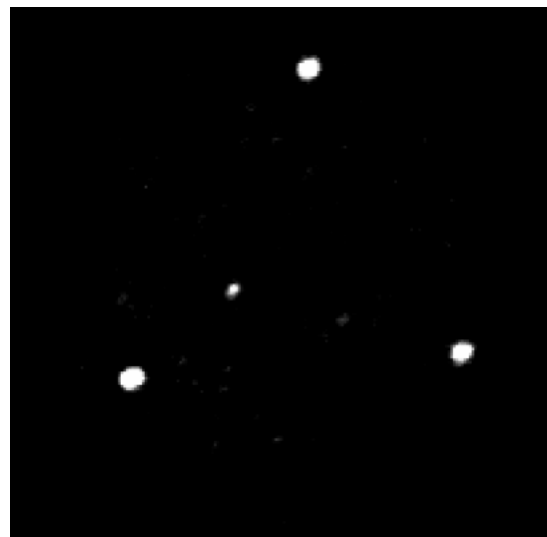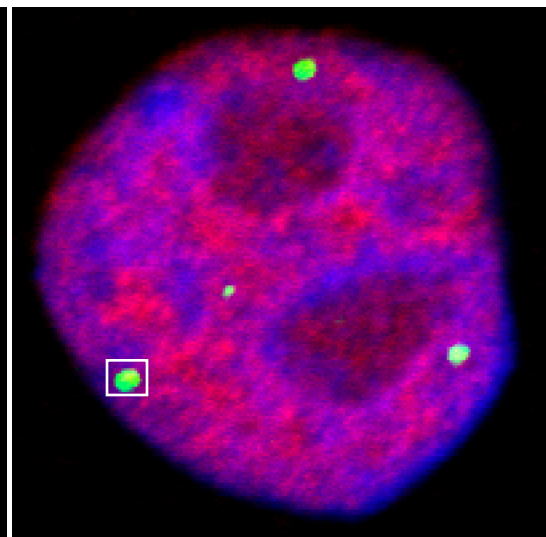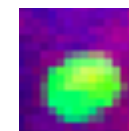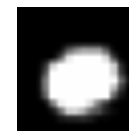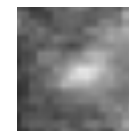

NM

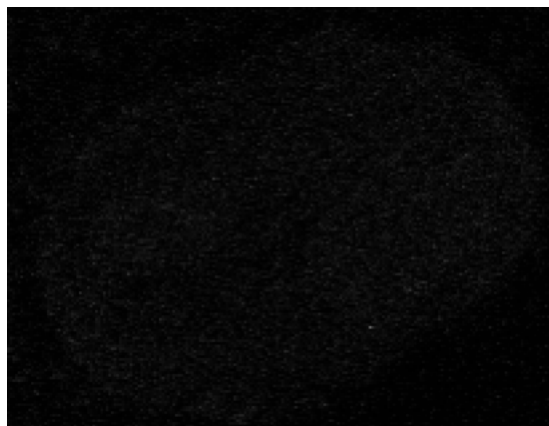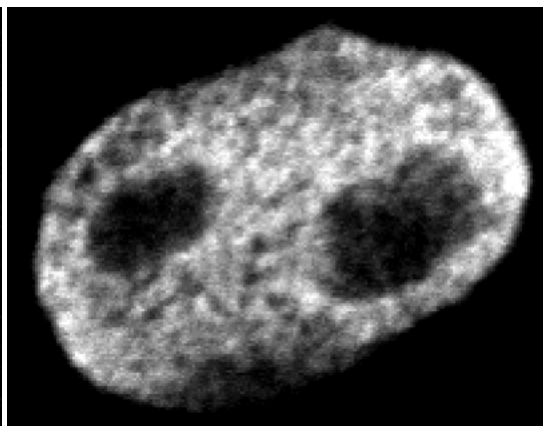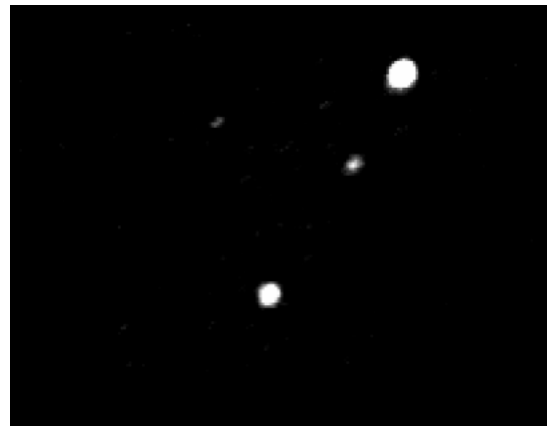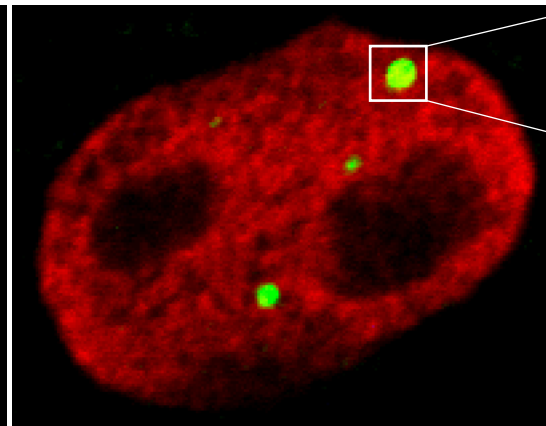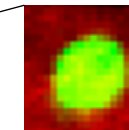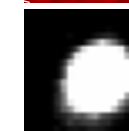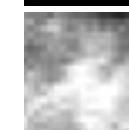

Supplement: NIHMS889254-supplement-Supp_FigS10.pdf [file NIHMS889254-supplement-Supp_FigS10.pdf]

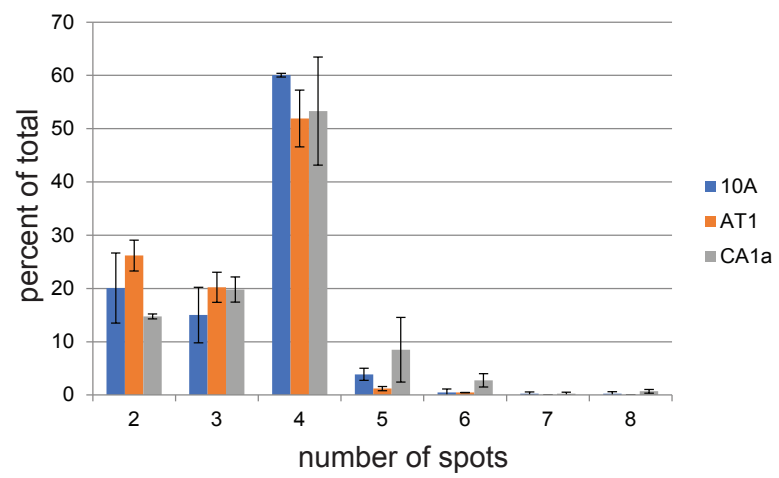

Supplement: NIHMS889254-supplement-Supp_FigS2.pdf [file NIHMS889254-supplement-Supp_FigS2.pdf]

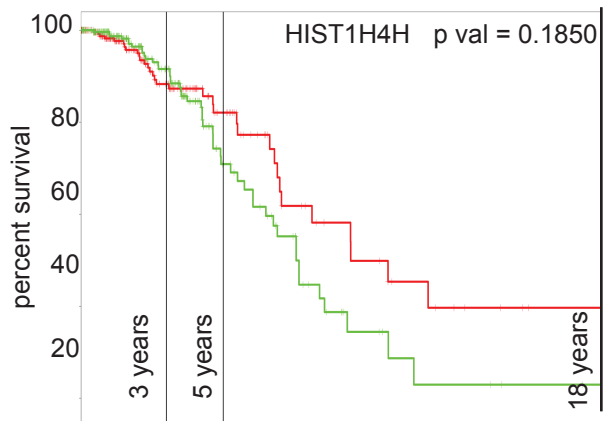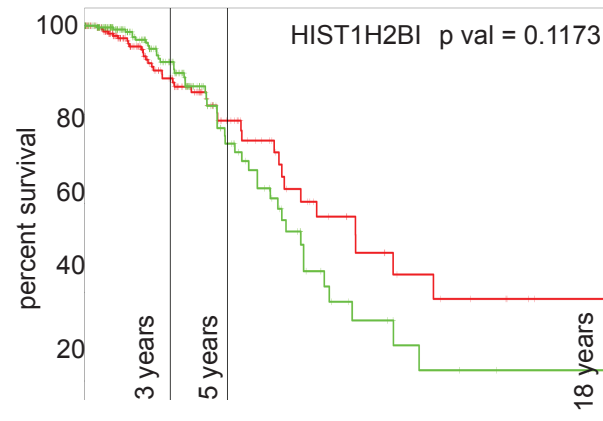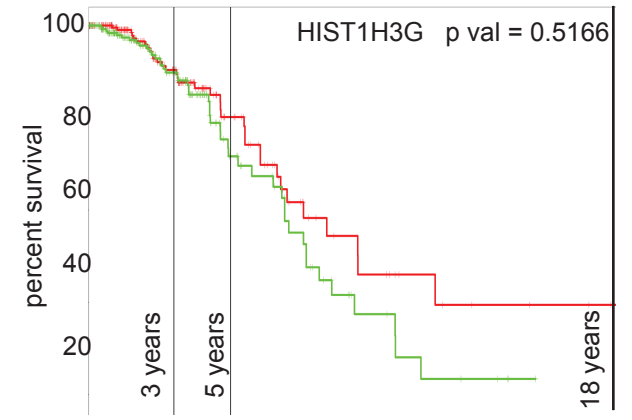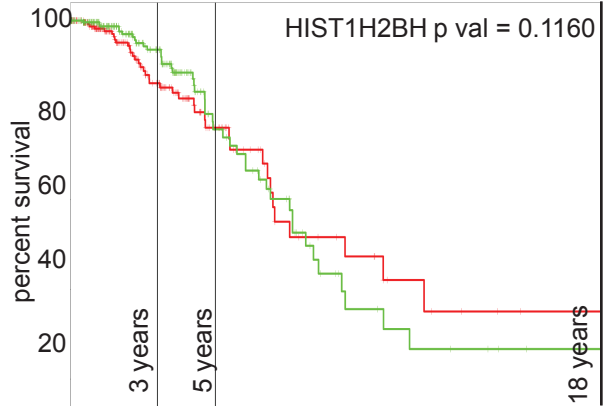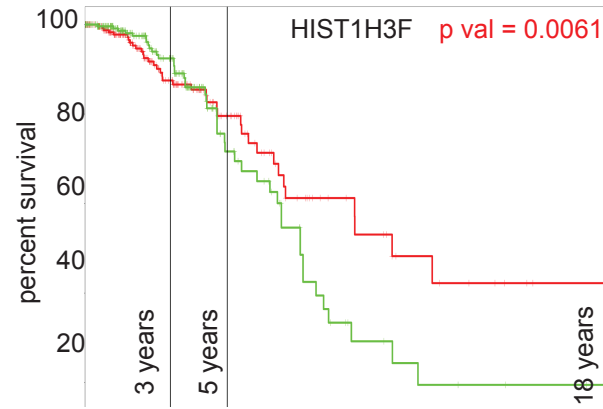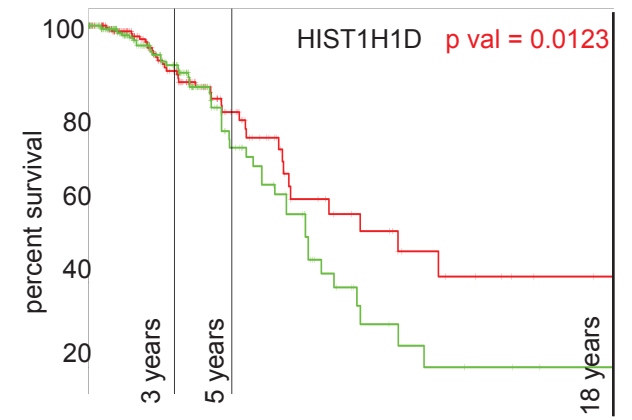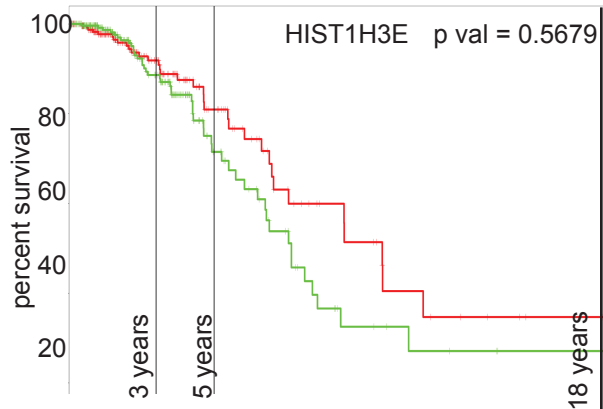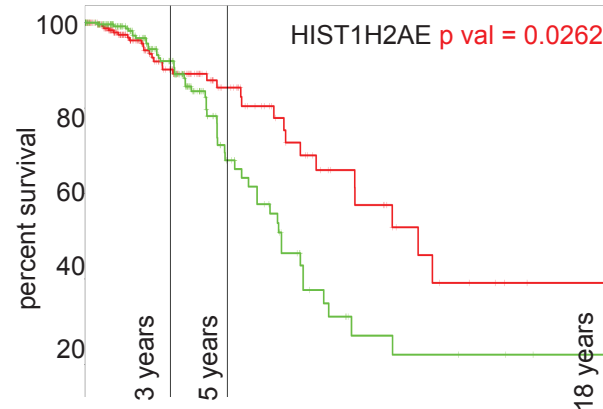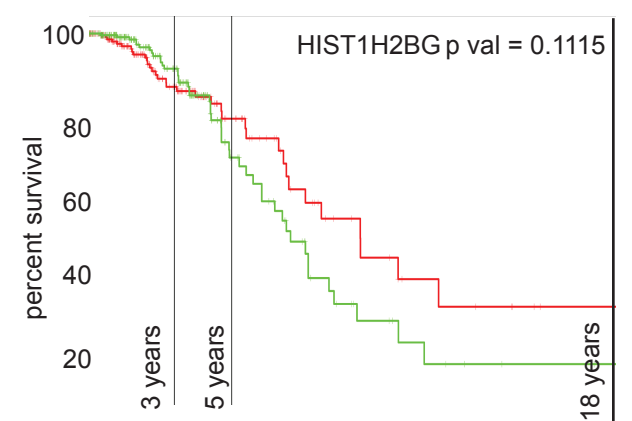

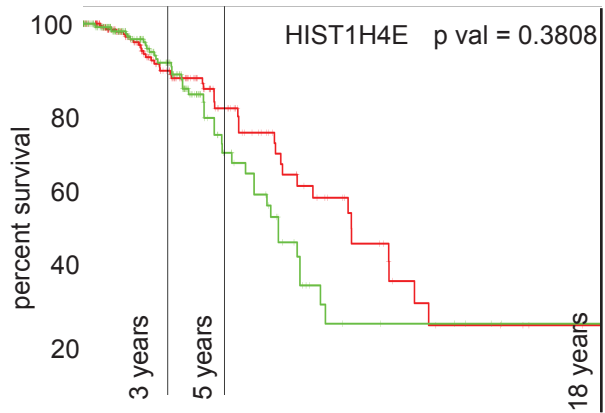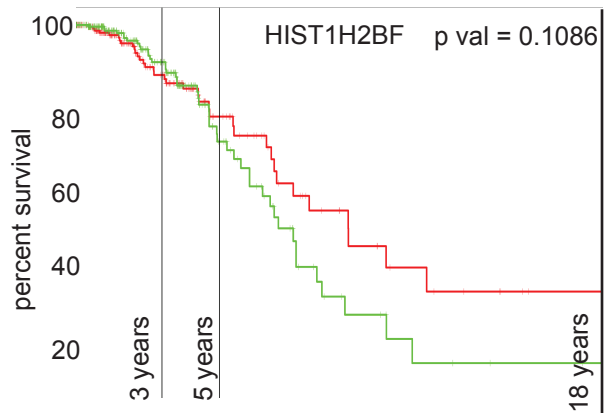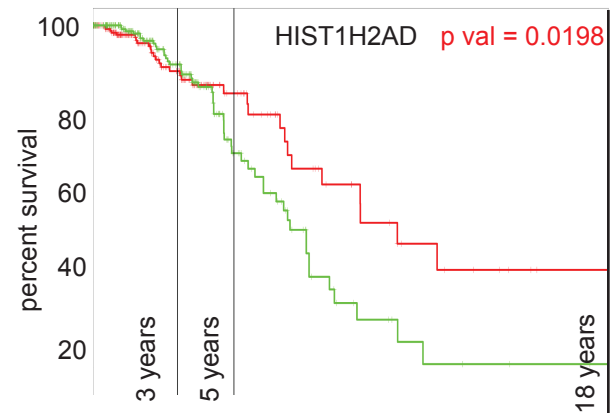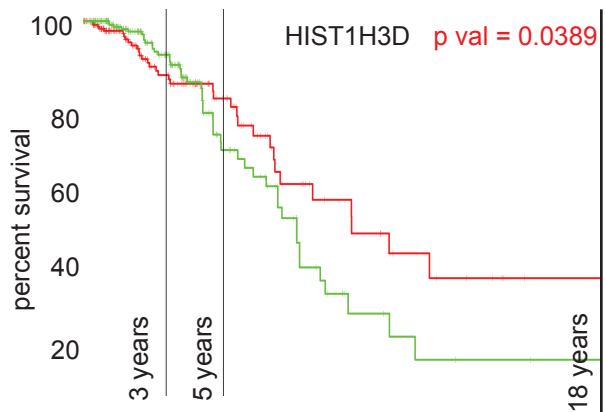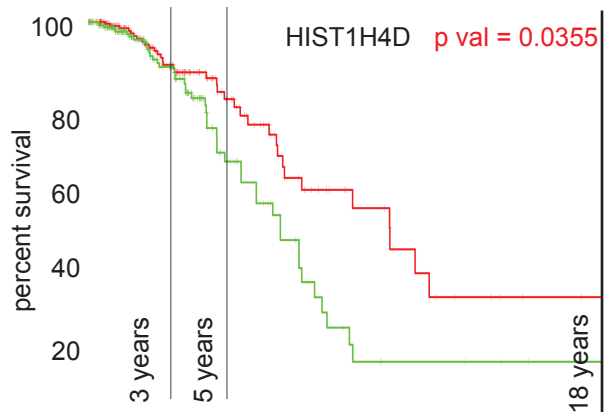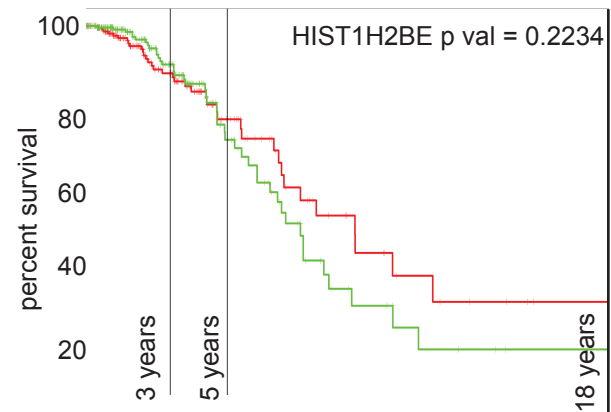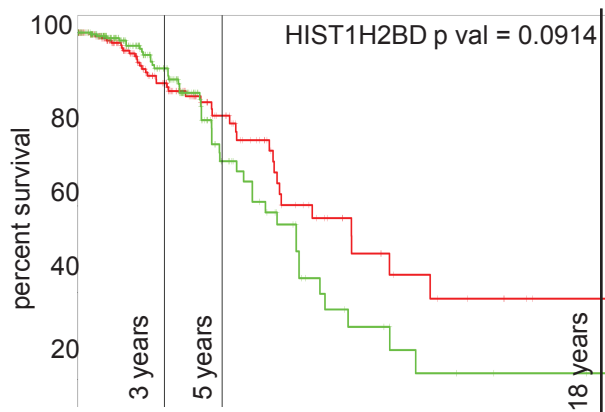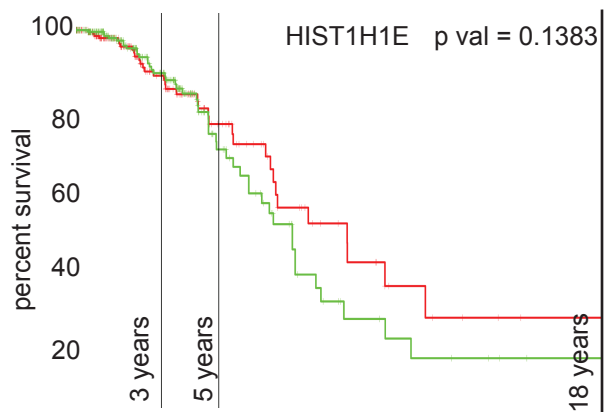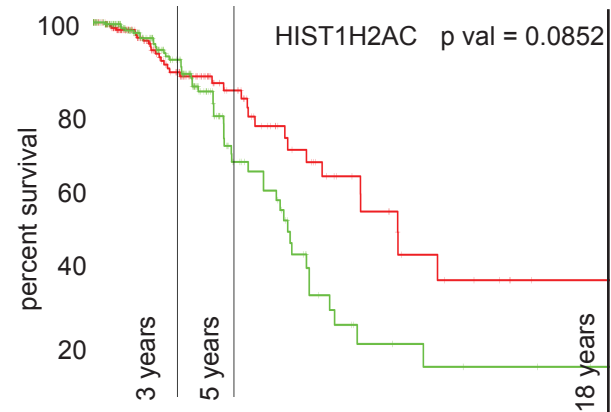

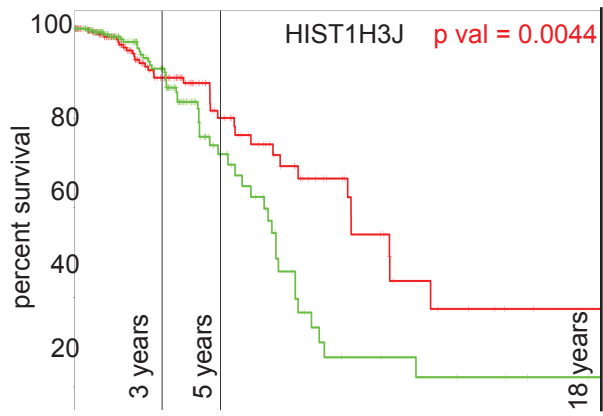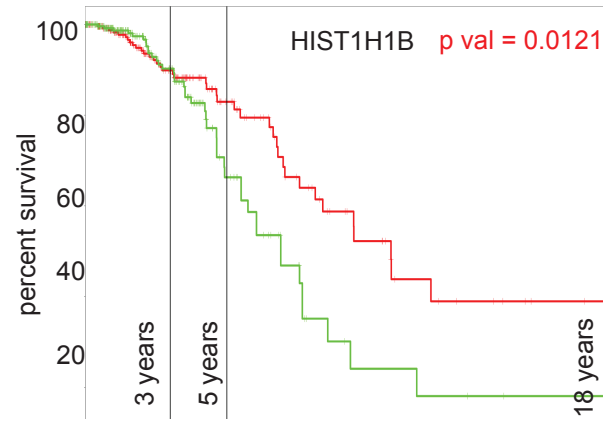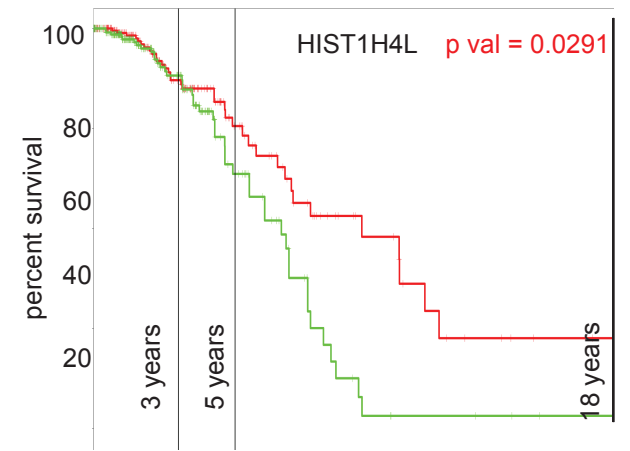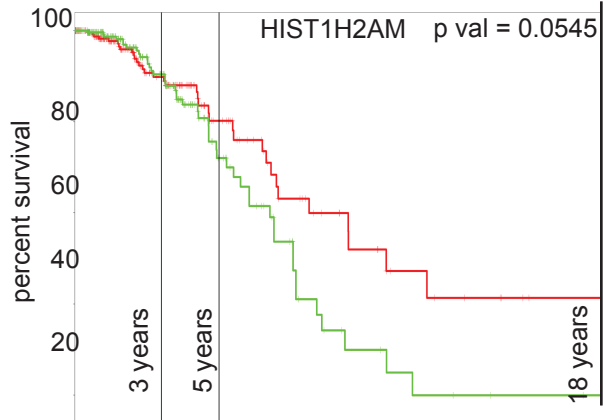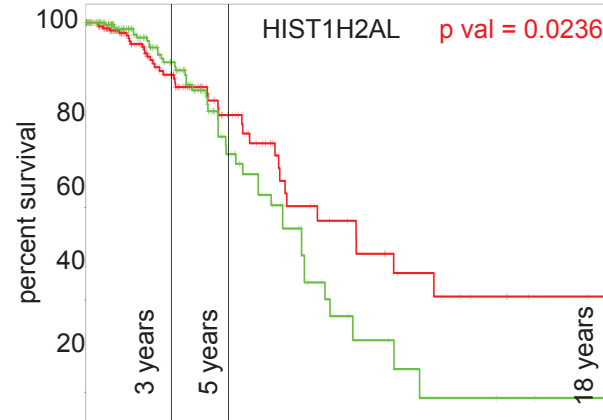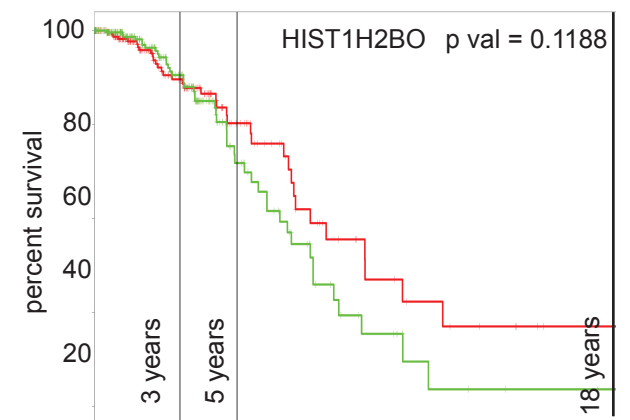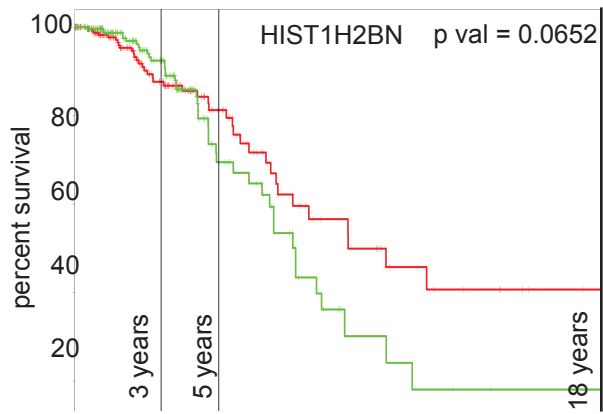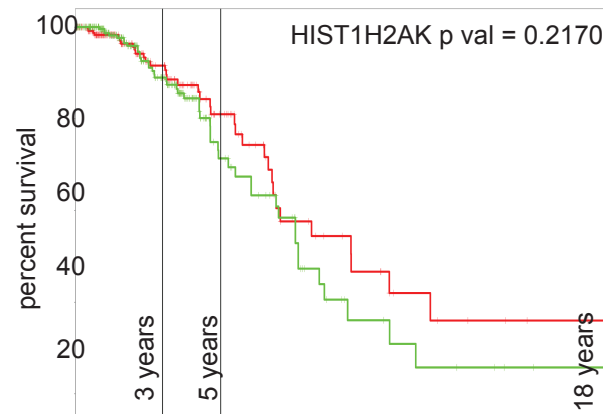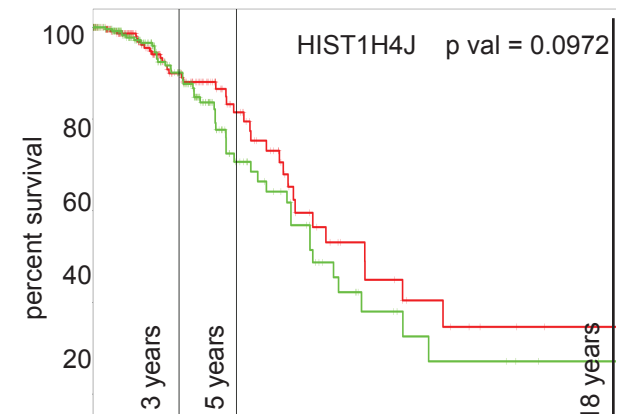

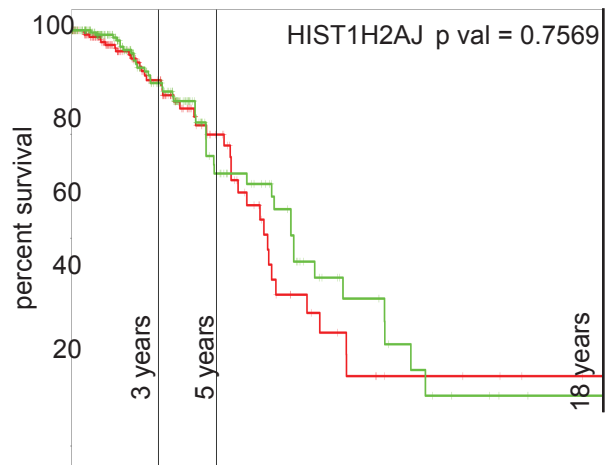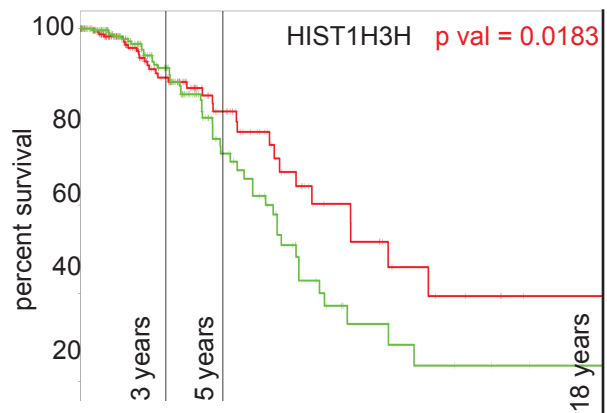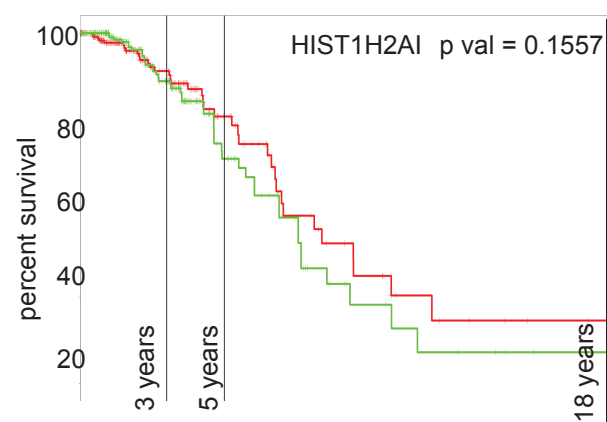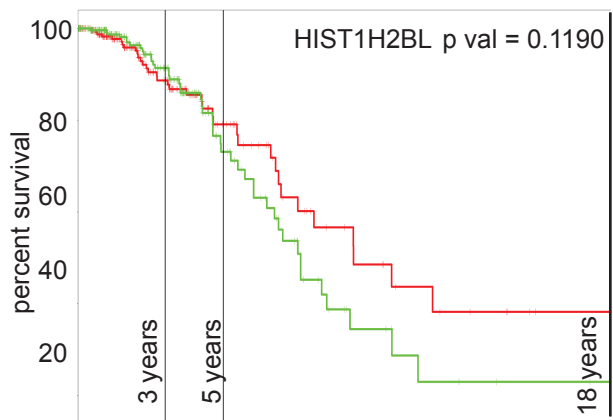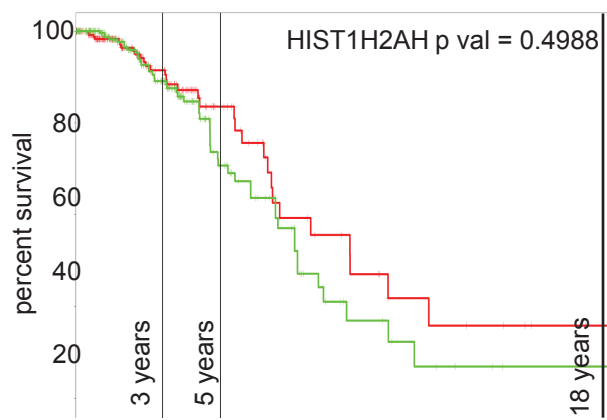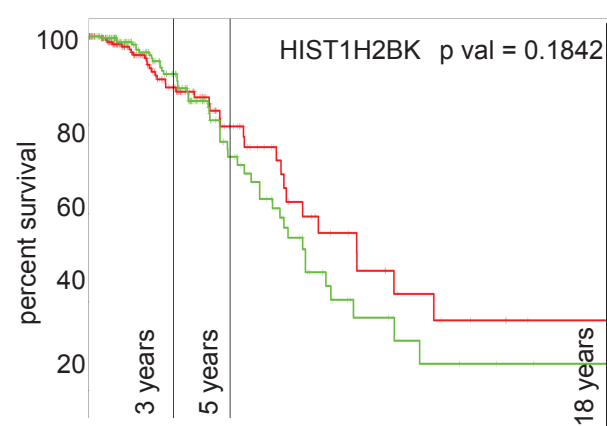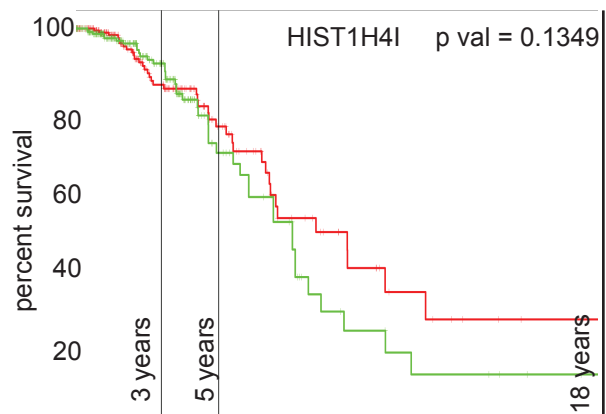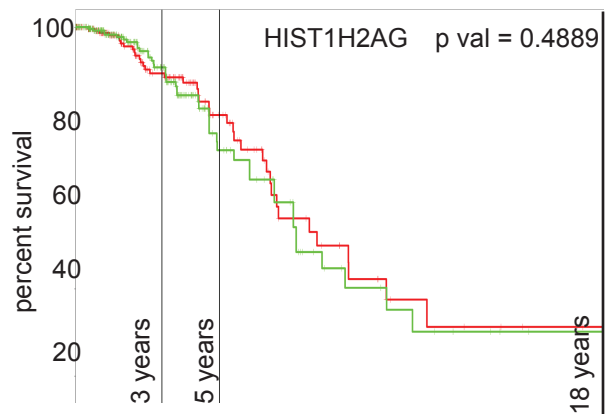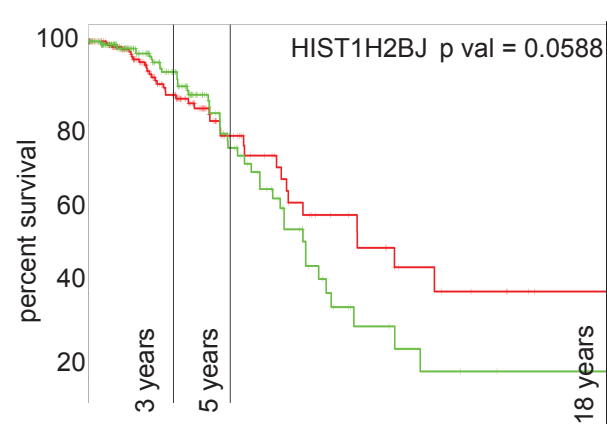



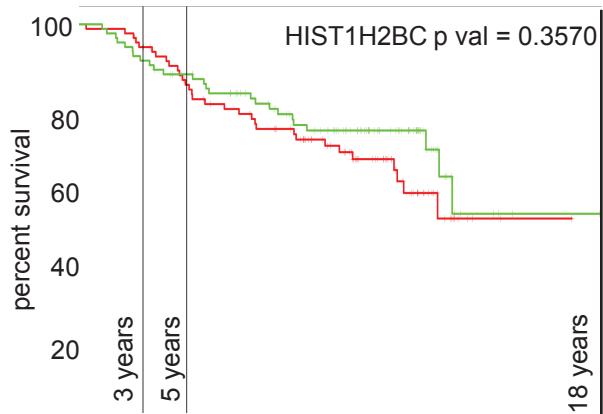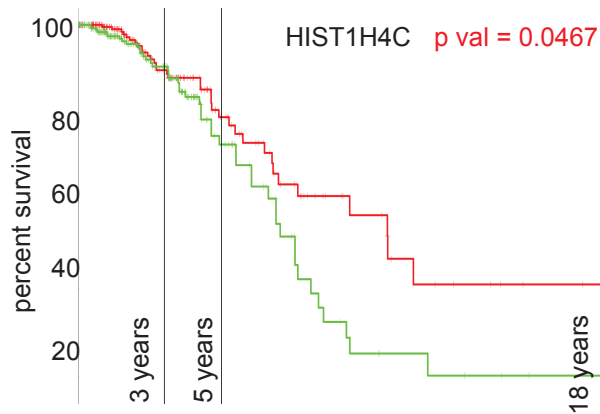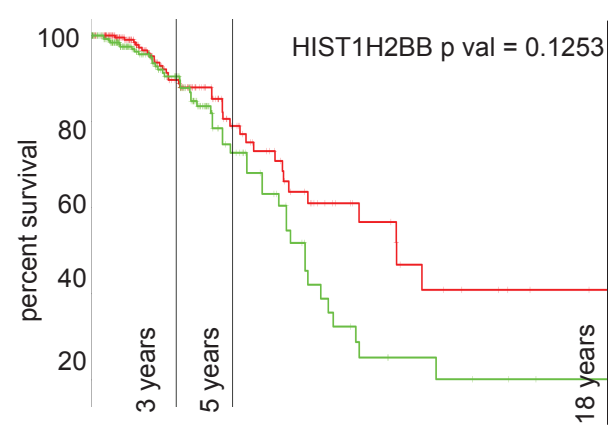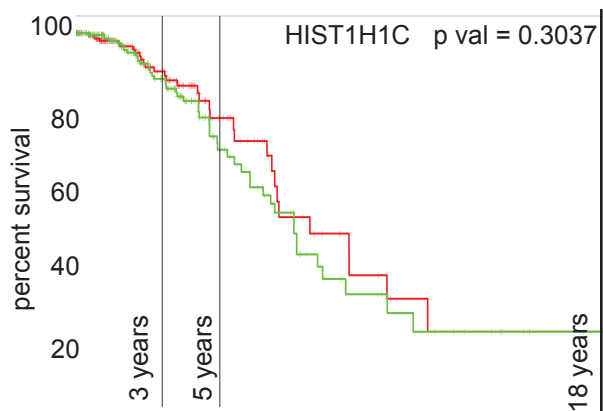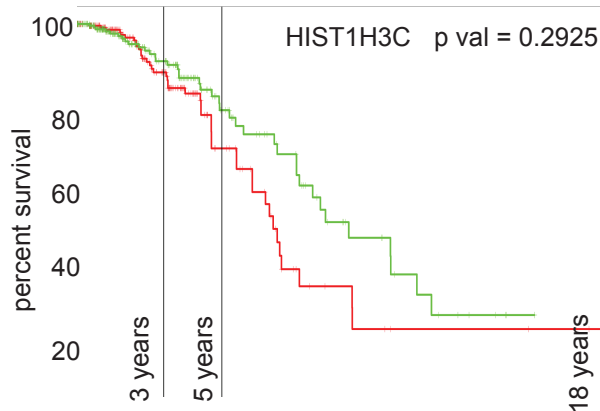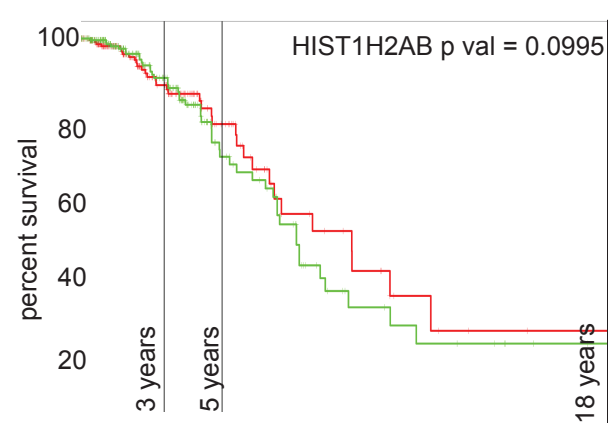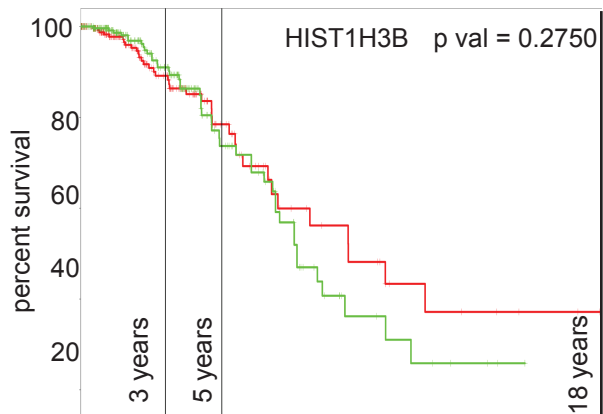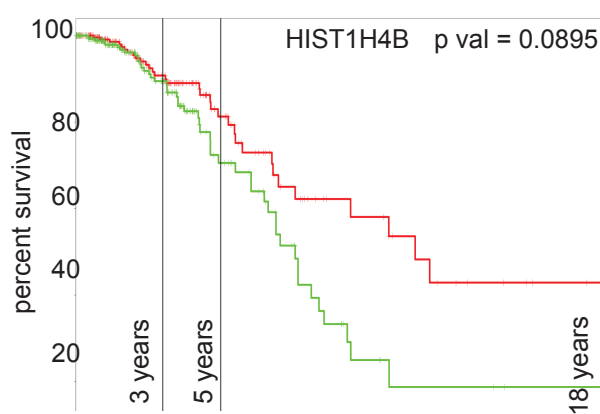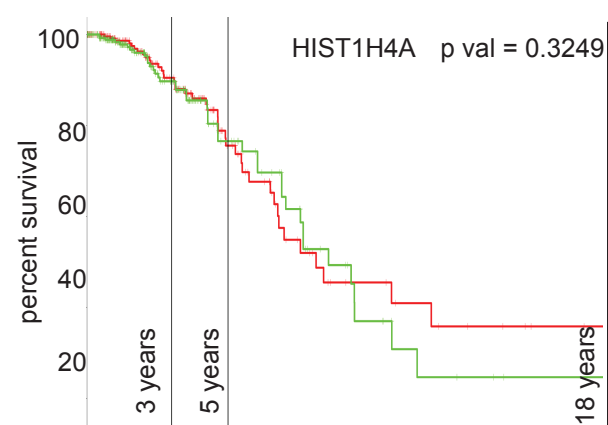

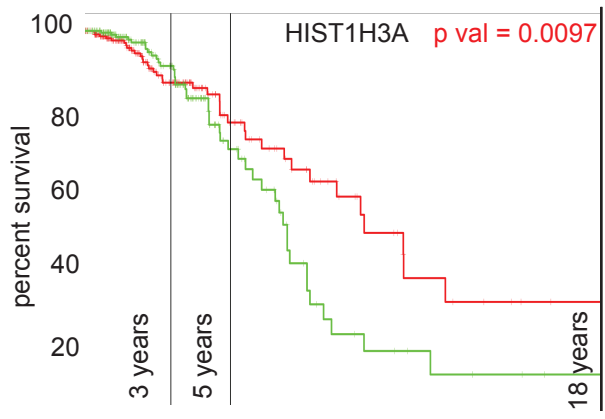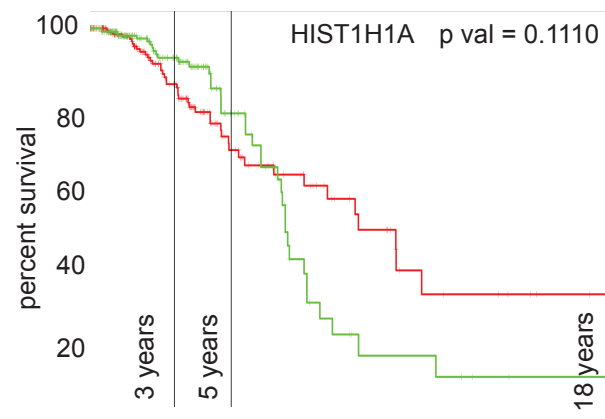

Supplement: NIHMS889254-supplement-Supp_FigS5.pdf [file NIHMS889254-supplement-Supp_FigS5.pdf]

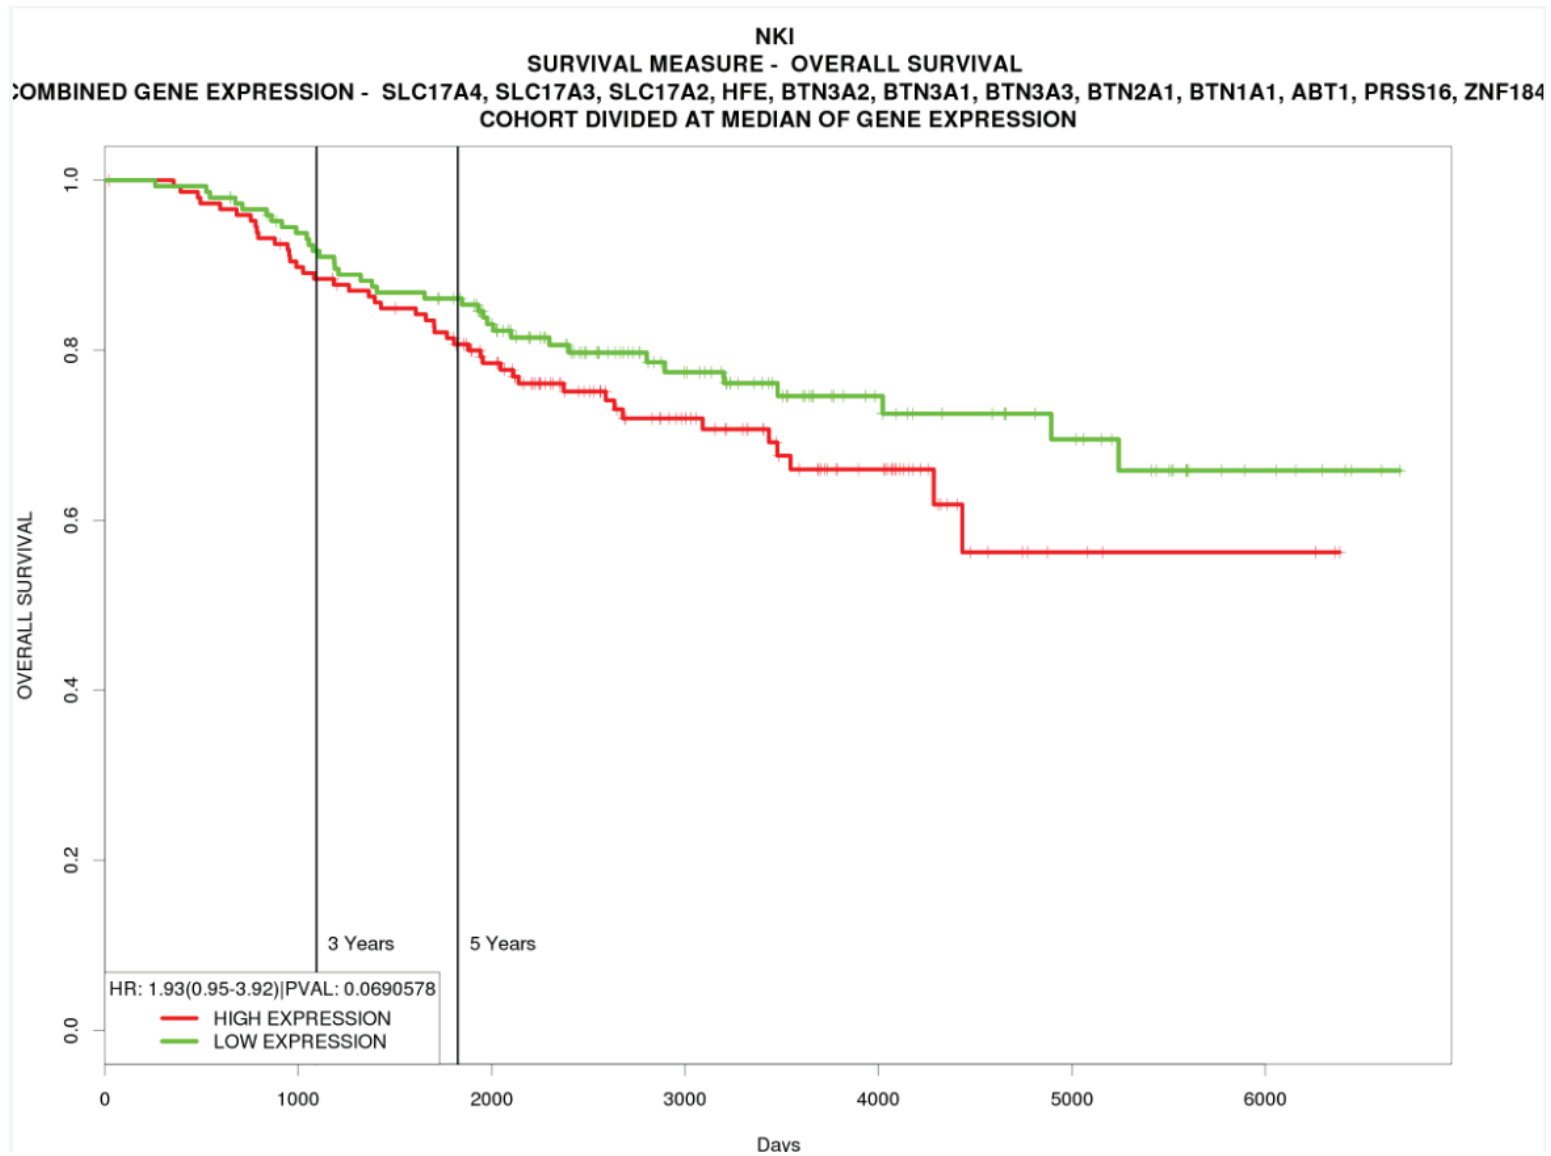

Supplement: NIHMS889254-supplement-Supp_FigS8.pdf [file NIHMS889254-supplement-Supp_FigS8.pdf]
